# Supplementary material for: Design of 2D materials – MSi2CxN4−x (M = Cr, Mo, and W; x = 1 and 2) – with tunable electronic and magnetic properties
Source: Royal Society of Chemistry journal article supplement (doi:10.1039/d1nr00461a), 2021-01-01
Supplement: d1nr00461a1.pdf [file d1nr00461a1.pdf]

## *Supplementary Materials for*

### **Design of 2D materials – $\text{MSi}_2\text{C}_x\text{N}_{4-x}$ (M = Cr, Mo, and W; x = 1 and 2) with tunable electronic and magnetic properties**

Bowen Li<sup>1+</sup>, Jiazhong Geng<sup>1+</sup>, Haoqiang Ai<sup>2</sup>, Youchao Kong<sup>1</sup>, Haoyun Bai<sup>1</sup>, Kin Ho Lo<sup>2</sup>, Kar  
Wei Ng<sup>1\*</sup>, Yoshiyuki Kawazoe<sup>3,4,5</sup>, and Hui Pan<sup>1,6\*</sup>

<sup>1</sup>Institute of Applied Physics and Materials Engineering, University of Macau, Macao SAR,  
999078, P.R.China

<sup>2</sup>Department of Electromechanical Engineering, Faculty of Science and Technology, University  
of Macau, Macao SAR, 999078, P. R. China

<sup>3</sup>New Industry Creation Hatchery Center, Tohoku University, Sendai, Japan

<sup>4</sup>Department of Physics and Nanotechnology, SRM Institute of Science and Technology,  
Kattankulathur 603203, Tamil Nadu, India

<sup>5</sup>School of Physics, Suranaree University of Technology, 111 University Avenue Muang,  
Nakhon Ratchasima 30000, Thailand

<sup>6</sup>Department of Physics and Chemistry, Faculty of Science and Technology, University of  
Macau, Macao SAR, 999078, P. R. China

\*Corresponding Authors

H. Pan: huipan@um.edu.mo (email), +853 88224427 (tel.), +853-88222454 (fax)

K. W. Ng: billyng@um.edu.mo (email)

<sup>+</sup>The two authors contribute to this work equally.

Table S1. Structural parameters, including lattice constants, bonding angle, and corresponding

| Structure                                       | a (Å)   | b (Å)   | c (Å)    | $\theta_1$ (°) | $\theta_2$ (°) | Space Group    |
|-------------------------------------------------|---------|---------|----------|----------------|----------------|----------------|
| CrSi <sub>2</sub> N <sub>4</sub>                | 2.84531 | 2.84531 | 24.53985 | 90.45          | 69.90          | P3m1           |
| CrSi <sub>2</sub> CN <sub>3</sub>               | 2.93316 | 2.93316 | 23.09139 | 90.58          | 70.06          | P3m1           |
| CrSi <sub>2</sub> N <sub>2</sub> C <sub>2</sub> | 3.02460 | 3.02460 | 23.64520 | 94.02          | 64.73          | P $\bar{6}$ m2 |
| CrSi <sub>2</sub> N <sub>3</sub> C              | 2.92179 | 2.92179 | 25.33855 | 92.24          | 67.78          | P3m1           |
| MoSi <sub>2</sub> N <sub>4</sub>                | 2.91155 | 2.91155 | 25.51660 | 88.14          | 73.13          | P3m1           |
| MoSi <sub>2</sub> CN <sub>3</sub>               | 2.92303 | 2.92303 | 23.25167 | 87.53          | 73.25          | P3m1           |
| MoSi <sub>2</sub> N <sub>2</sub> C <sub>2</sub> | 3.04500 | 3.04500 | 23.32958 | 91.26          | 68.73          | P $\bar{6}$ m2 |
| MoSi <sub>2</sub> N <sub>3</sub> C              | 2.97916 | 2.97916 | 24.37215 | 90.20          | 70.75          | P3m1           |
| WSi <sub>2</sub> N <sub>4</sub>                 | 2.91605 | 2.91605 | 23.36308 | 87.87          | 73.51          | P3m1           |
| WSi <sub>2</sub> CN <sub>3</sub>                | 2.93970 | 2.93970 | 22.98874 | 87.40          | 72.97          | P3m1           |
| WSi <sub>2</sub> N <sub>2</sub> C <sub>2</sub>  | 3.04615 | 3.04615 | 23.31187 | 91.03          | 69.07          | P $\bar{6}$ m2 |
| WSi <sub>2</sub> N <sub>3</sub> C               | 2.98016 | 2.98016 | 24.35565 | 90.03          | 89.20          | P3m1           |

space group for MSi<sub>2</sub>N<sub>4</sub> and MSi<sub>2</sub>C<sub>x</sub>N<sub>4-x</sub>.

Table S2. Calculated ground energy (eV/supercell), band gap ( $E_g$ ) (eV) and conducting properties (CP) of MSi<sub>2</sub>N<sub>4</sub> systems in non-magnetic (NM), anti-ferromagnetic (AFM) and ferromagnetic (FM) states. S – Semiconductor.

| Structure                        | NM       | AFM      | FM       | $E_g$ | CP |
|----------------------------------|----------|----------|----------|-------|----|
| CrSi <sub>2</sub> N <sub>4</sub> | -238.344 | -238.344 | -238.344 | 0.49  | S  |
| MoSi <sub>2</sub> N <sub>4</sub> | -246.916 | -246.916 | -246.916 | 1.74  | S  |
| WSi <sub>2</sub> N <sub>4</sub>  | -255.028 | -255.028 | -255.028 | 2.08  | S  |

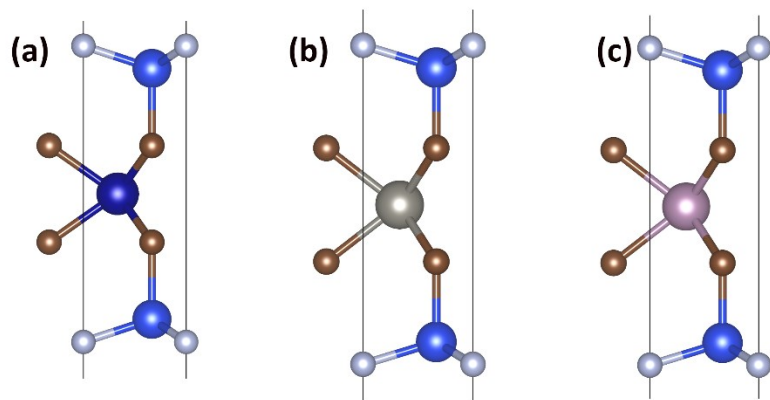

Figure S1. Structures for (a)  $\text{CrSi}_2\text{C}_2\text{N}_2$ , (b)  $\text{MoSi}_2\text{C}_2\text{N}_2$ , and (c)  $\text{WSi}_2\text{C}_2\text{N}_2$ .

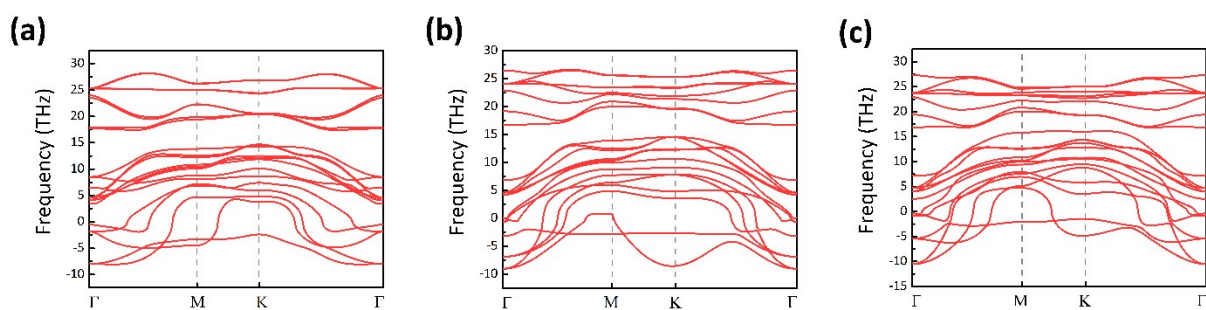

Figure S2. Calculated phonon dispersions for: (a)  $\text{CrSi}_2\text{C}_2\text{N}_2$ , (b)  $\text{MoSi}_2\text{C}_2\text{N}_2$ , and (c)  $\text{WSi}_2\text{C}_2\text{N}_2$ .

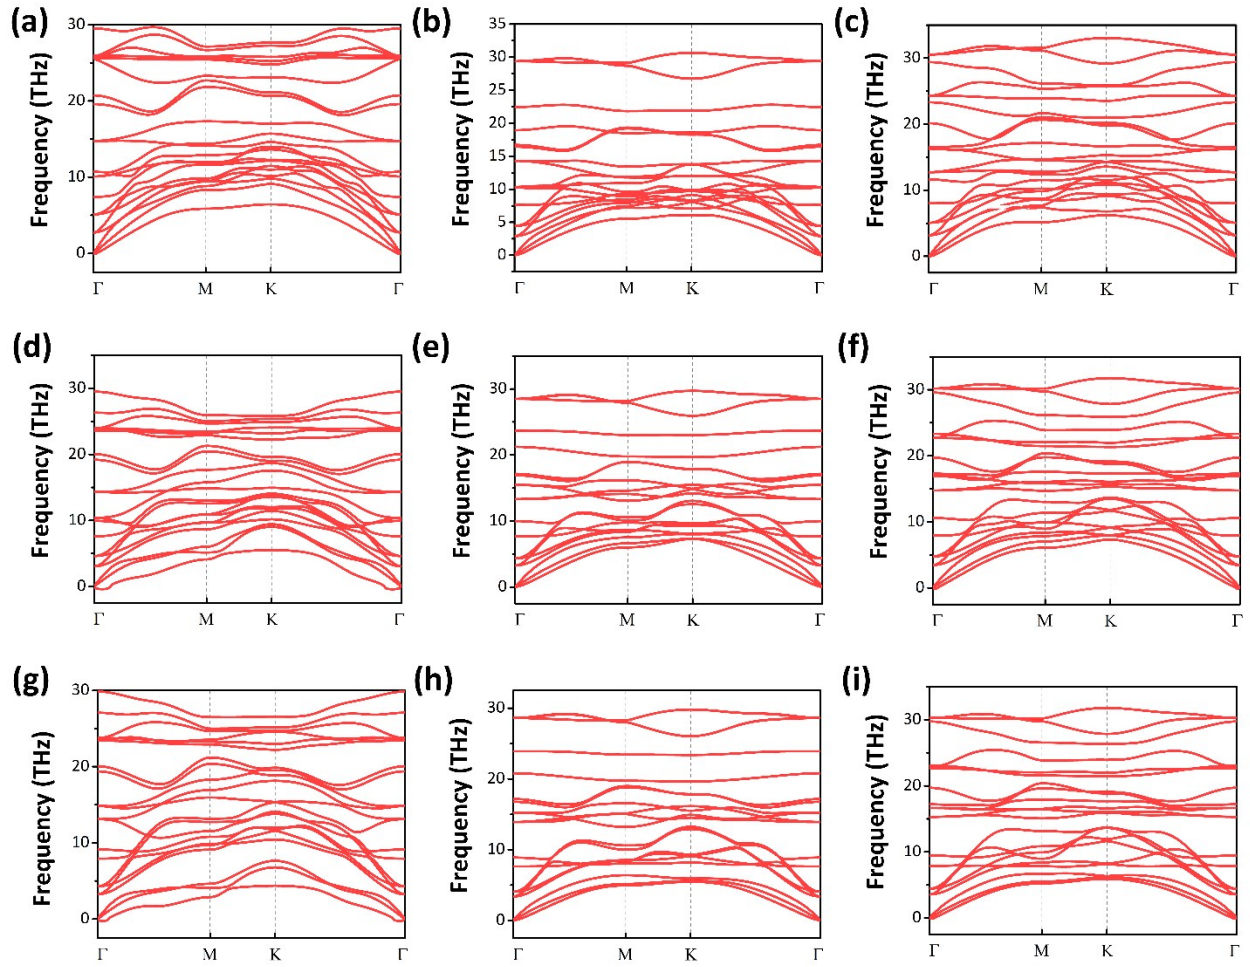

Figure S3. Phonon dispersions for (a)  $\text{CrSi}_2\text{CN}_3$ , (b)  $\text{CrSi}_2\text{N}_2\text{C}_2$ , (c)  $\text{CrSi}_2\text{N}_3\text{C}$ , (d)  $\text{MoSi}_2\text{CN}_3$ , (e)  $\text{MoSi}_2\text{N}_2\text{C}_2$ , (f)  $\text{MoSi}_2\text{N}_3\text{C}$ , (g)  $\text{WSi}_2\text{CN}_3$ , (h)  $\text{WSi}_2\text{N}_2\text{C}_2$ , and (i)  $\text{WSi}_2\text{N}_3\text{C}$ .

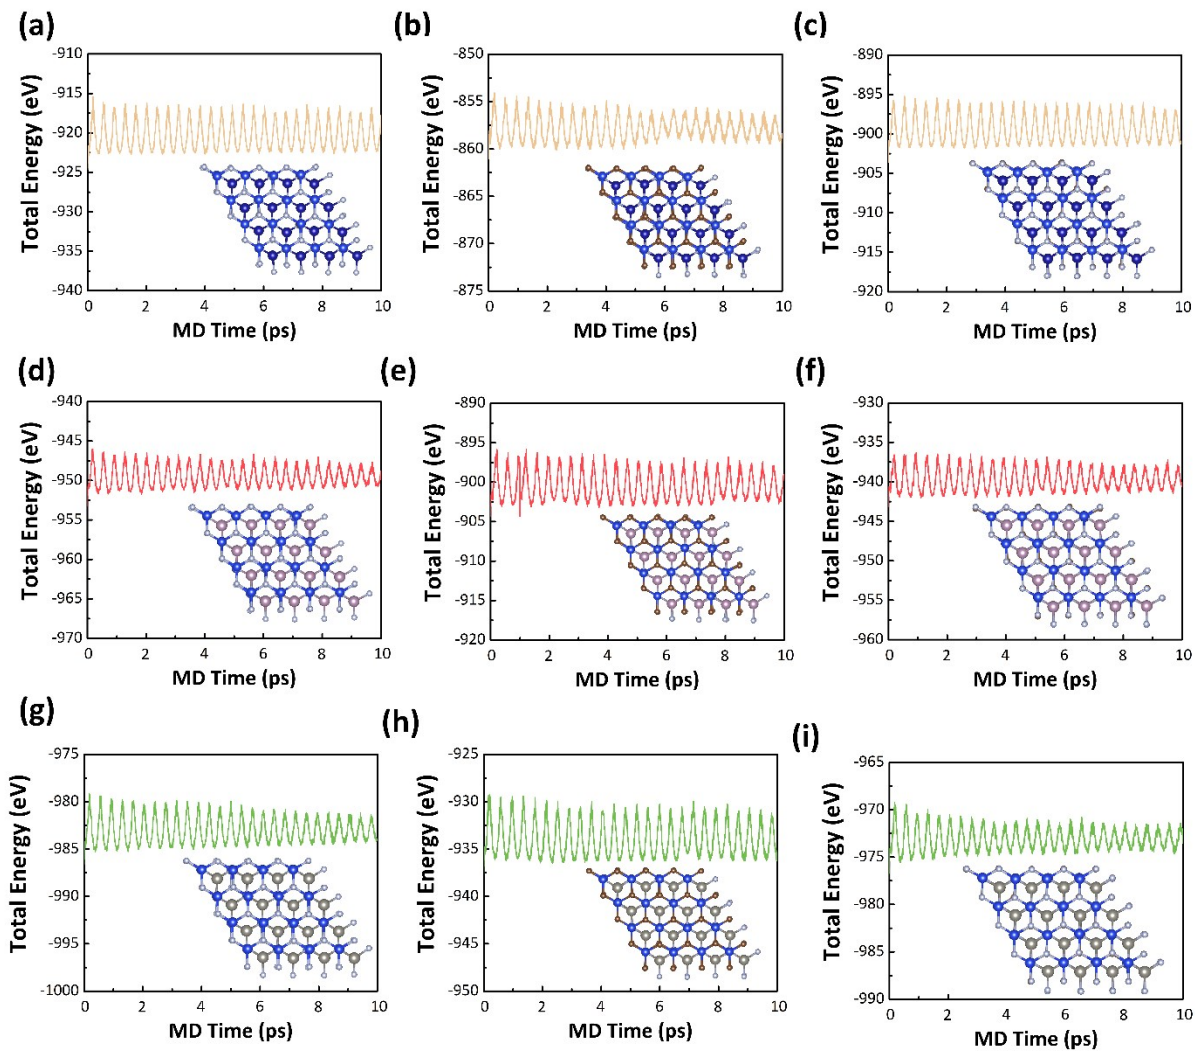

Figure S4. The energy vibrations and final structures after the AIMD test for (a)  $\text{CrSi}_2\text{CN}_3$ , (b)  $\text{CrSi}_2\text{N}_2\text{C}_2$ , (c)  $\text{CrSi}_2\text{N}_3\text{C}$ , (d)  $\text{MoSi}_2\text{CN}_3$ , (e)  $\text{MoSi}_2\text{N}_2\text{C}_2$ , (f)  $\text{MoSi}_2\text{N}_3\text{C}$ , (g)  $\text{WSi}_2\text{CN}_3$ , (h)  $\text{WSi}_2\text{N}_2\text{C}_2$ , and (i)  $\text{WSi}_2\text{N}_3\text{C}$ .

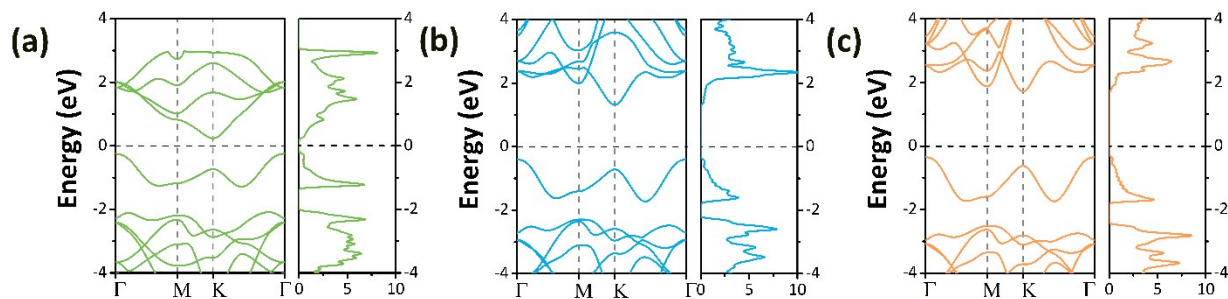

Figure S5. Band structures and TDOSs: (a)  $\text{CrSi}_2\text{N}_4$ , (b)  $\text{MoSi}_2\text{N}_4$ , and (c)  $\text{WSi}_2\text{N}_4$ .

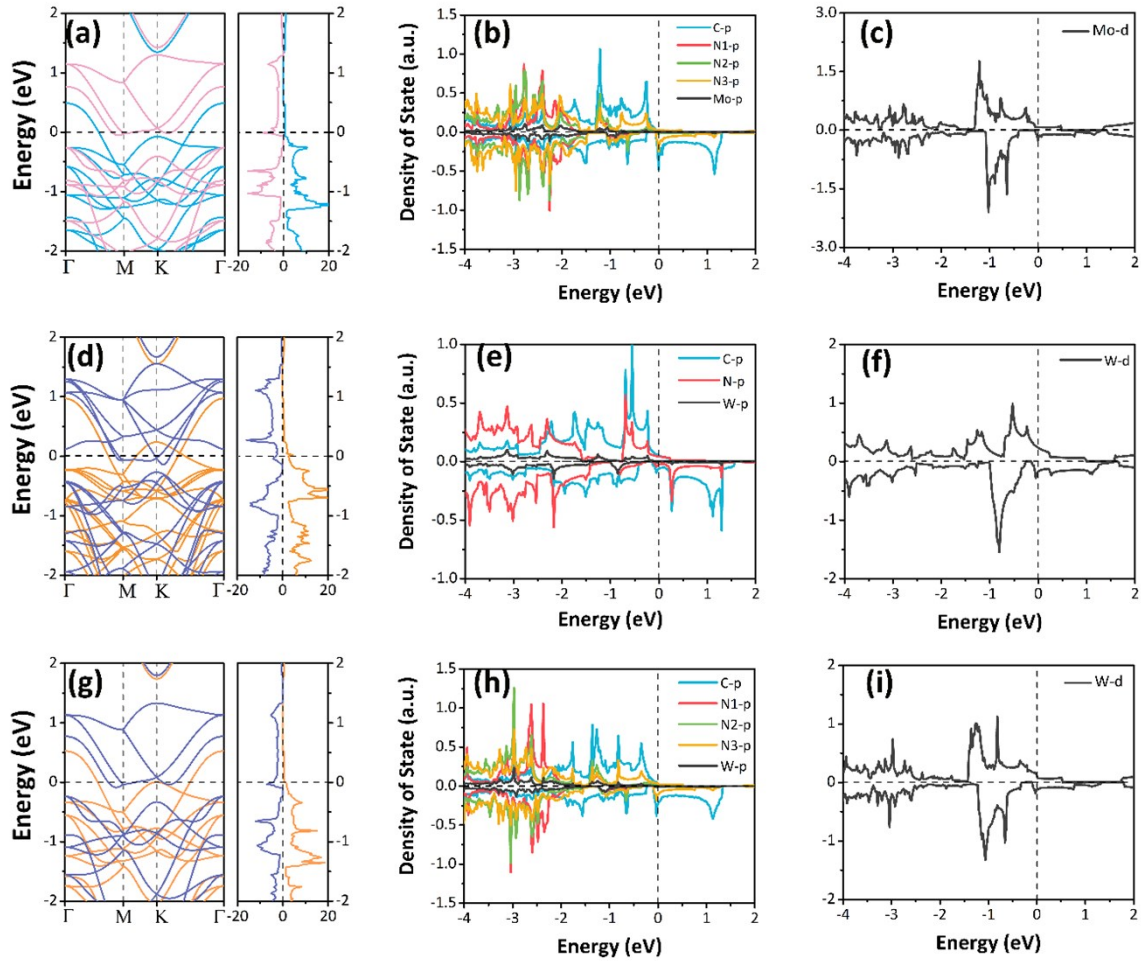

Figure S6. Calculated electronic properties of FM  $\text{MoSi}_2\text{N}_3\text{C}$ ,  $\text{WSi}_2\text{N}_2\text{C}_2$ , and  $\text{WSi}_2\text{N}_3\text{C}$ : (a) band structure and TDOSs of  $\text{MoSi}_2\text{N}_3\text{C}$ ; (b) PDOSs of C, N, and Mo atom's p-electrons in  $\text{MoSi}_2\text{N}_3\text{C}$ ; (c) PDOSs of Mo d-electrons in  $\text{MoSi}_2\text{N}_3\text{C}$ ; (d) band structure and TDOSs of  $\text{WSi}_2\text{N}_2\text{C}_2$ ; (e) PDOSs of C, N, and W atom's p-electrons in  $\text{WSi}_2\text{N}_2\text{C}_2$ ; (f) PDOSs of W d-electrons in  $\text{WSi}_2\text{N}_2\text{C}_2$ ; (g) band structure and TDOSs of  $\text{WSi}_2\text{N}_3\text{C}$ ; (h) PDOSs of C, N, and W atom's p-electrons in  $\text{WSi}_2\text{N}_3\text{C}$ ; and (i) PDOSs of W d-electrons in  $\text{WSi}_2\text{N}_3\text{C}$ .



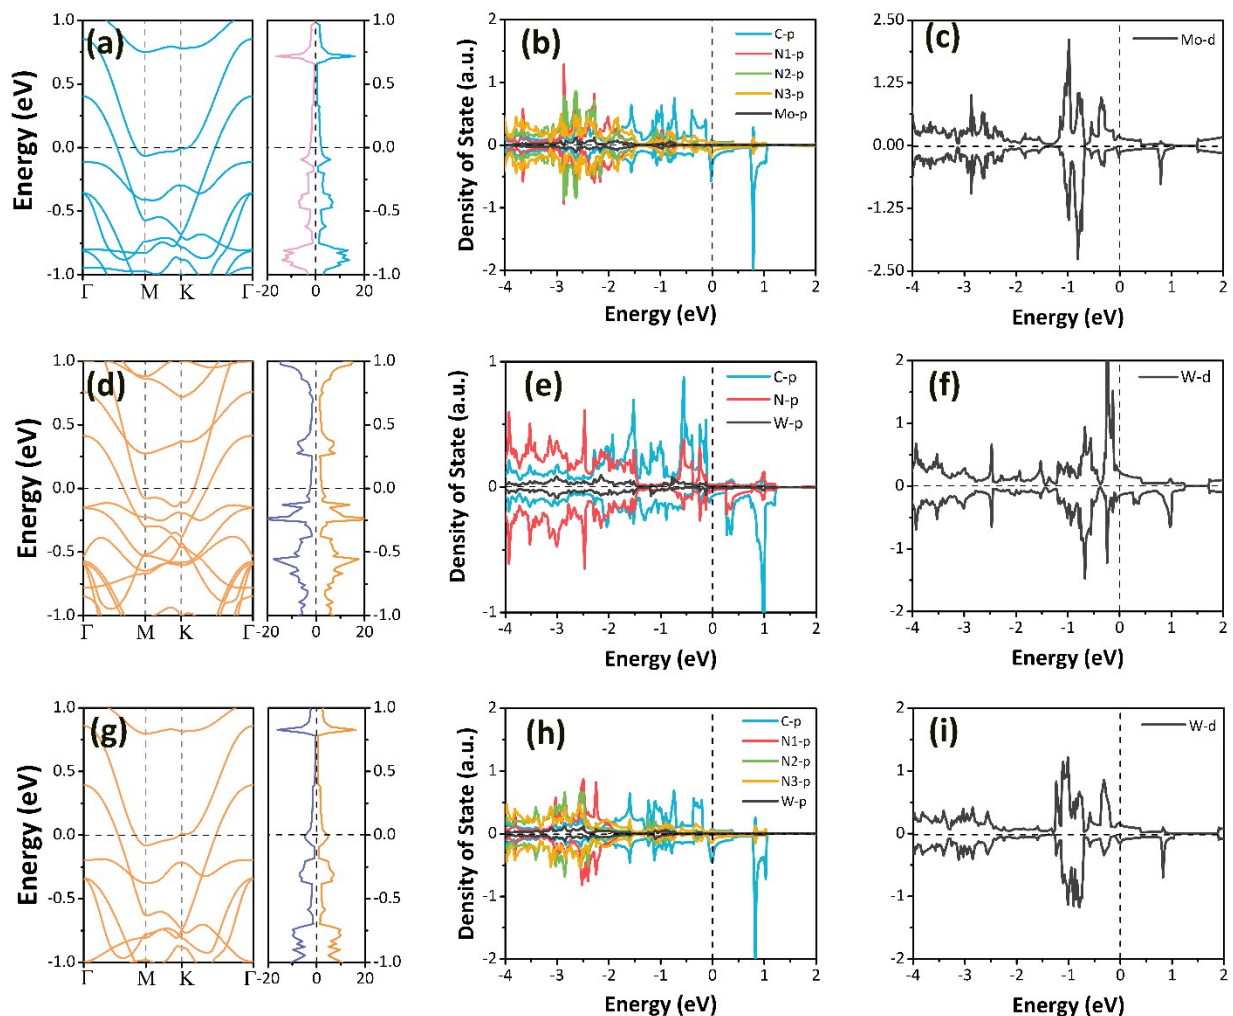

Figure S7. Calculated electronic properties of AFM  $\text{MoSi}_2\text{N}_3\text{C}$ ,  $\text{WSi}_2\text{N}_2\text{C}_2$ , and  $\text{WSi}_2\text{N}_3\text{C}$ : (a) band structure and TDOSs of  $\text{MoSi}_2\text{N}_3\text{C}$ ; (b) PDOSs of C, N, and Mo atom's p-electrons in  $\text{MoSi}_2\text{N}_3\text{C}$ ; (c) PDOSs of Mo d-electrons in  $\text{MoSi}_2\text{N}_3\text{C}$ ; (d) band structure and TDOSs of  $\text{WSi}_2\text{N}_2\text{C}_2$ ; (e) PDOSs of C, N, and W atom's p-electrons in  $\text{WSi}_2\text{N}_2\text{C}_2$ ; (f) PDOSs of W d-electrons in  $\text{WSi}_2\text{N}_2\text{C}_2$ ; (g) band structure and TDOSs of  $\text{WSi}_2\text{N}_3\text{C}$ ; (h) PDOSs of C, N, and W atom's p-electrons in  $\text{WSi}_2\text{N}_3\text{C}$ ; and (i) PDOSs of W d-electrons in  $\text{WSi}_2\text{N}_3\text{C}$ .

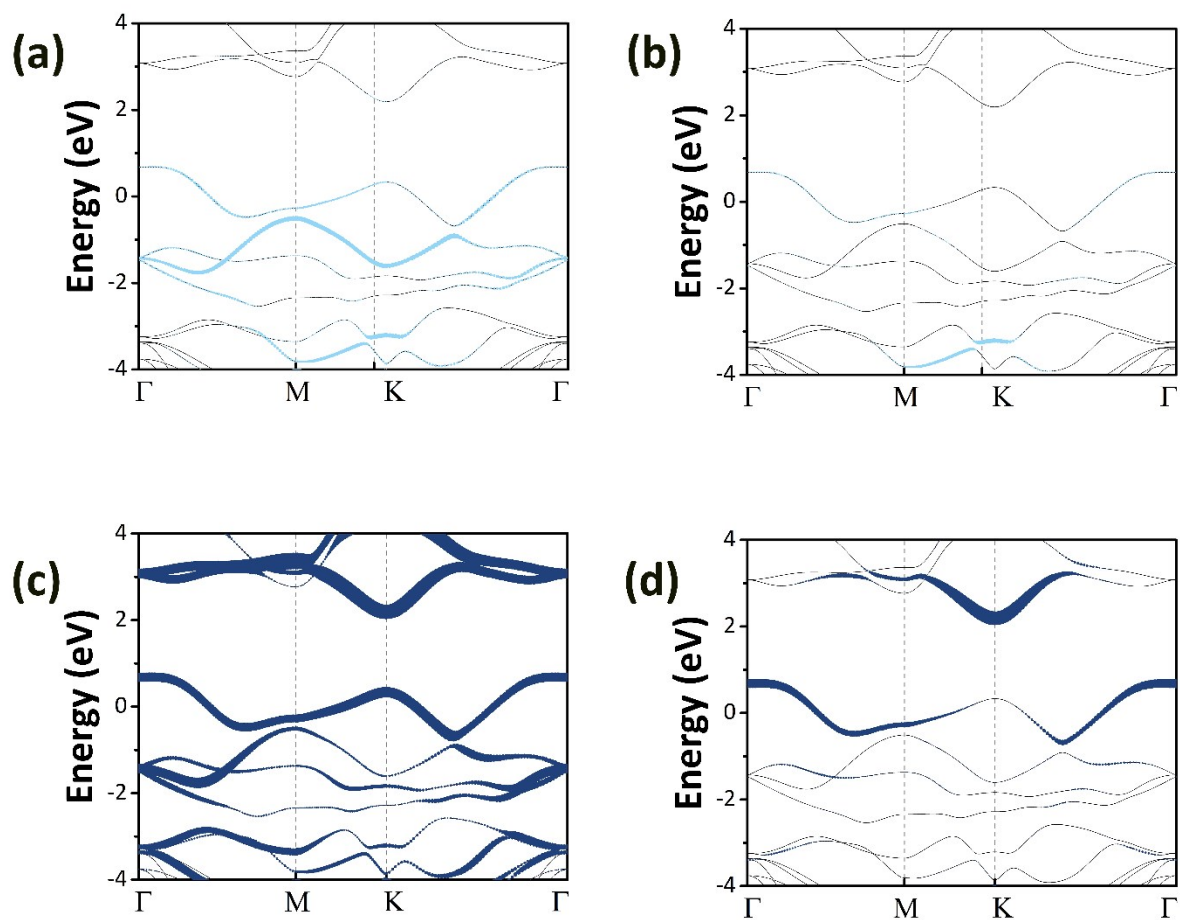

Figure S8. Contributions to PBANDs for MoSi<sub>2</sub>CN<sub>3</sub>: (a) total electrons of C atoms, (b) pz-orbital electrons of C atoms, (c) total electrons of Mo atoms, and (d) dz<sup>2</sup>-orbital electrons of Mo atoms.



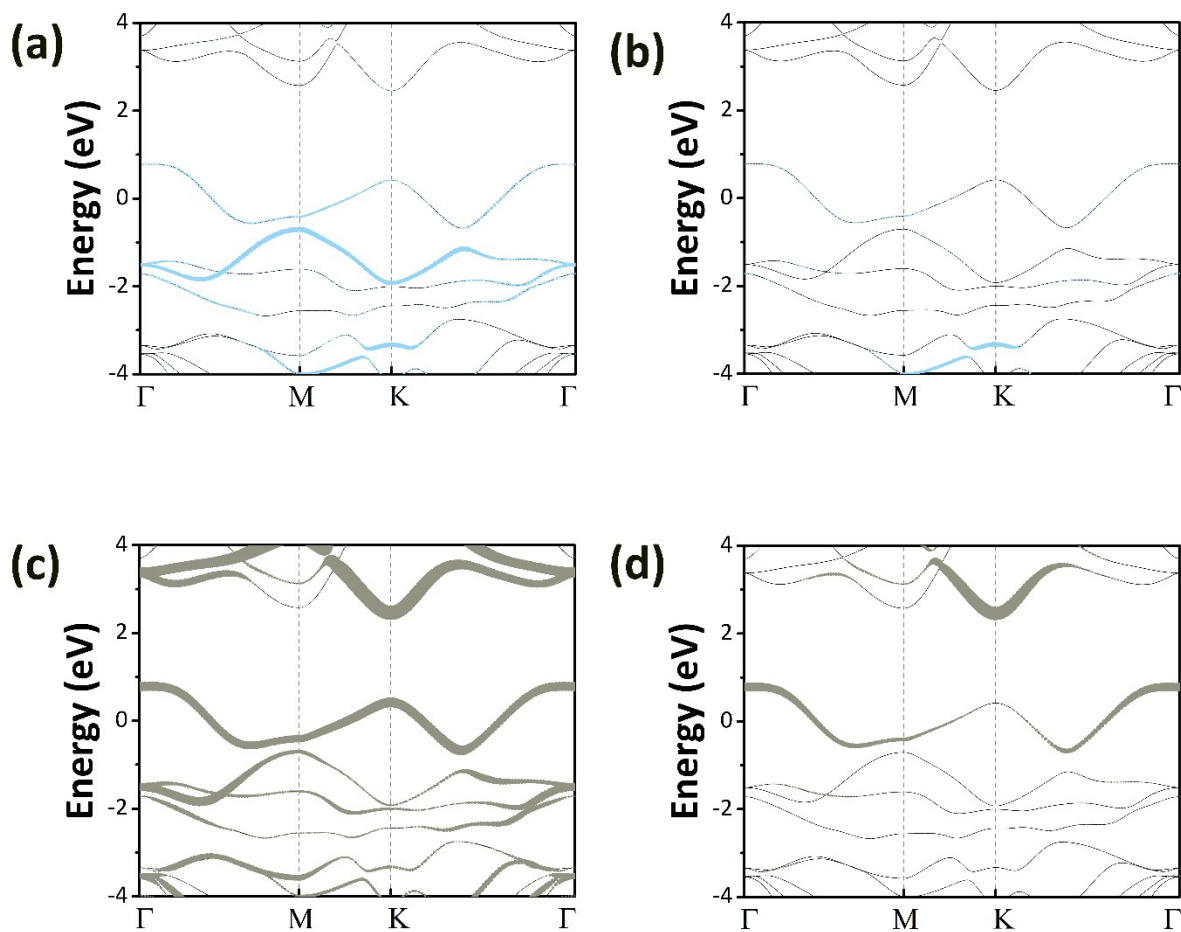

Figure S9. Contributions to PBANDs for  $\text{WSi}_2\text{CN}_3$ : (a) total electrons of C atoms, (b)  $p_z$ -orbital electrons of C atoms, (c) total electrons of W atoms, and (d)  $d_{z^2}$ -orbital electrons of W atoms.

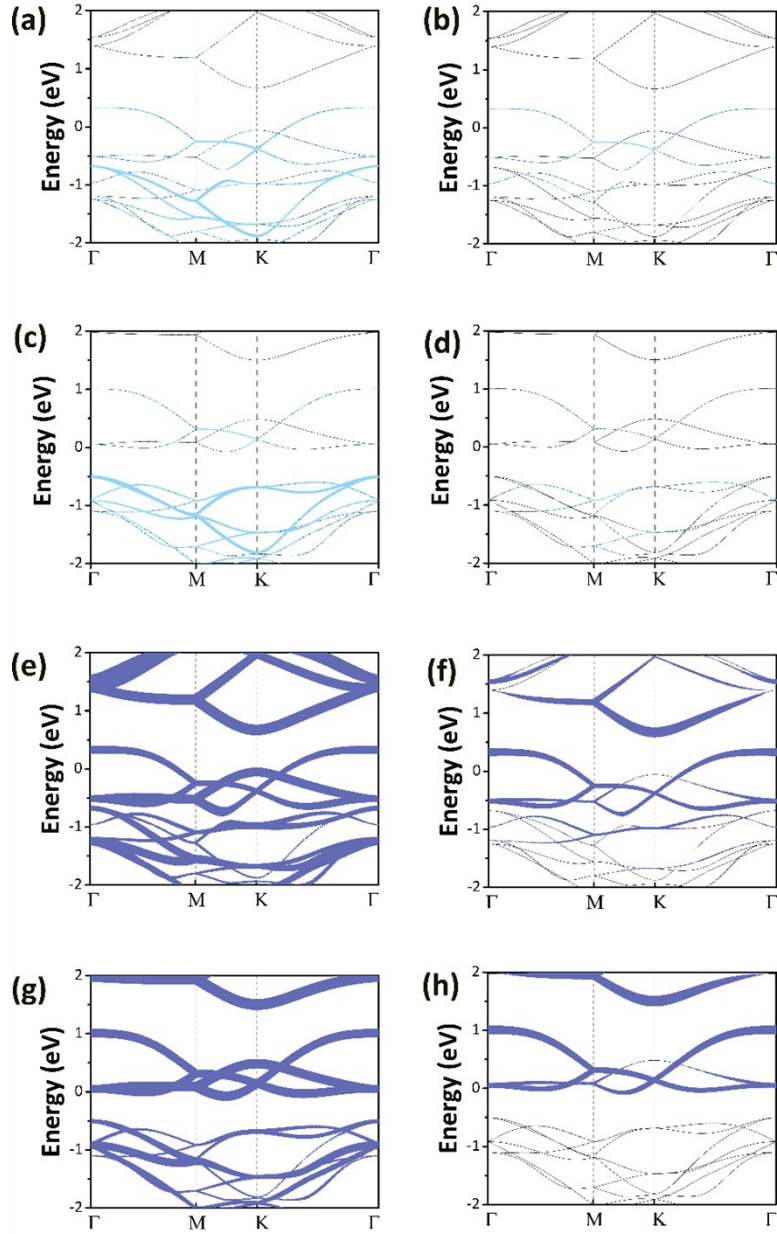

Figure S10. Contributions to PBANDs for FM  $\text{CrSi}_2\text{CN}_3$ : (a) total spin-up electrons of C atoms, (b) p<sub>z</sub>-orbital spin-up electrons of C atoms, (c) total spin-down electrons of C atoms, (d) p<sub>z</sub>-orbital spin-down electrons of C atoms, (e) total spin-up electrons of Cr atoms, (f) d<sub>z<sup>2</sup></sub>-orbital spin-up electrons of Cr atoms, (g) total spin-down electrons of Cr atoms, and (h) d<sub>z<sup>2</sup></sub>-orbital spin-down electrons of Cr atoms.

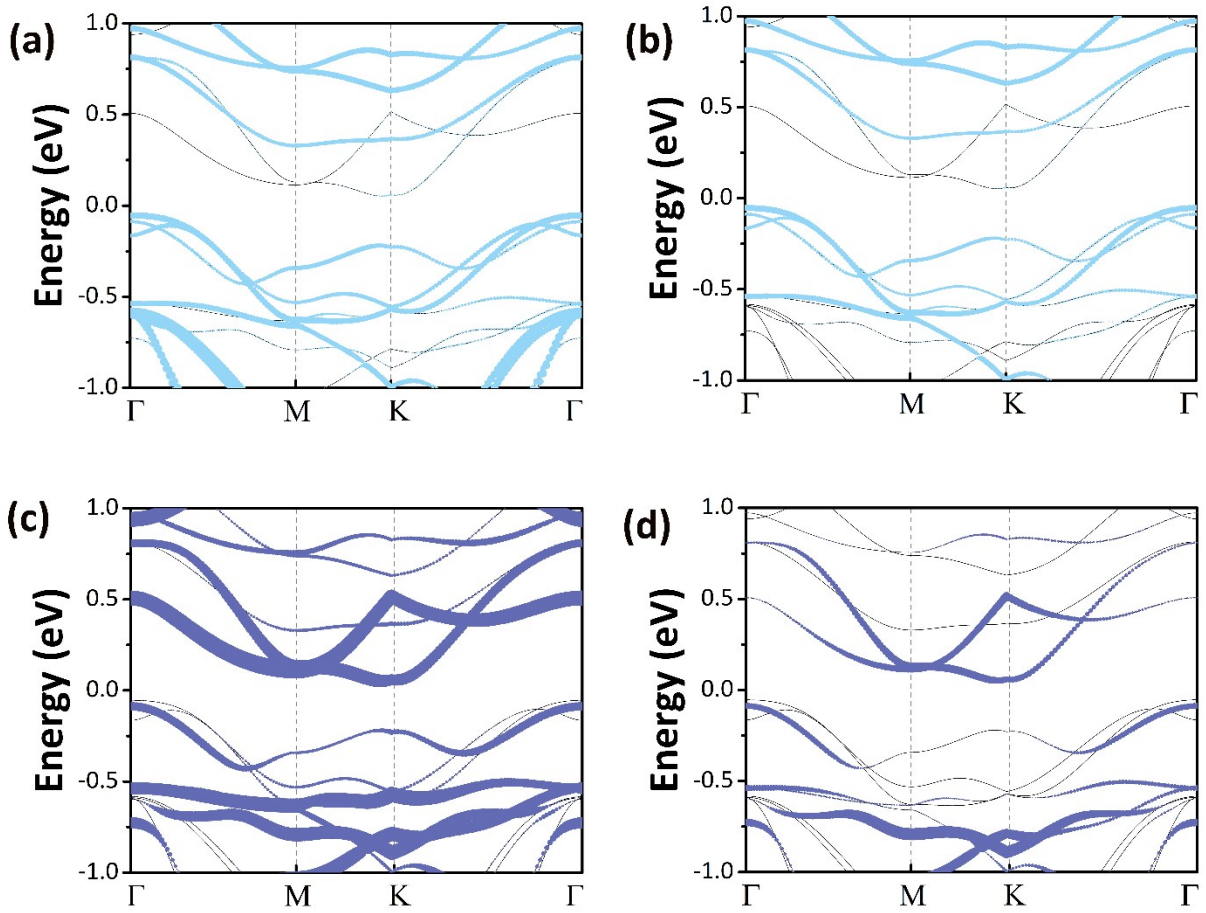

Figure S11. Contributions to PBANDs for AFM  $\text{CrSi}_2\text{N}_2\text{C}_2$  : (a) total electrons of C atoms, (b) p<sub>z</sub>-orbital electrons of C atoms, (c) total electrons of Cr atoms, and (d) d<sub>z<sup>2</sup></sub>-orbital electrons of Cr atoms.

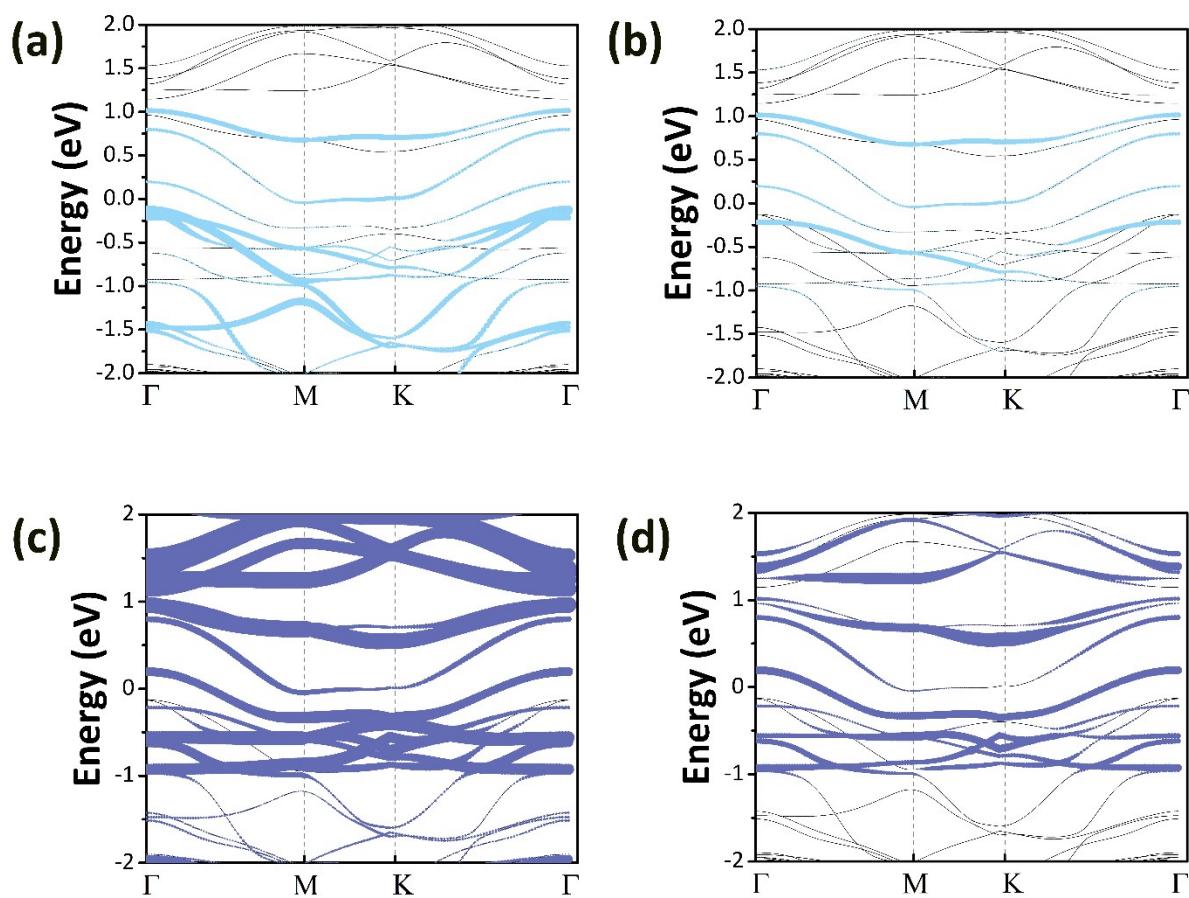

Figure S12. Contributions to PBANDs for AFM  $\text{CrSi}_2\text{N}_3\text{C}$  : (a) total electrons of C atoms, (b)  $p_z$ -orbital electrons of C atoms, (c) total electrons of Cr atoms, and (d)  $d_{z^2}$ -orbital electrons of Cr atoms.

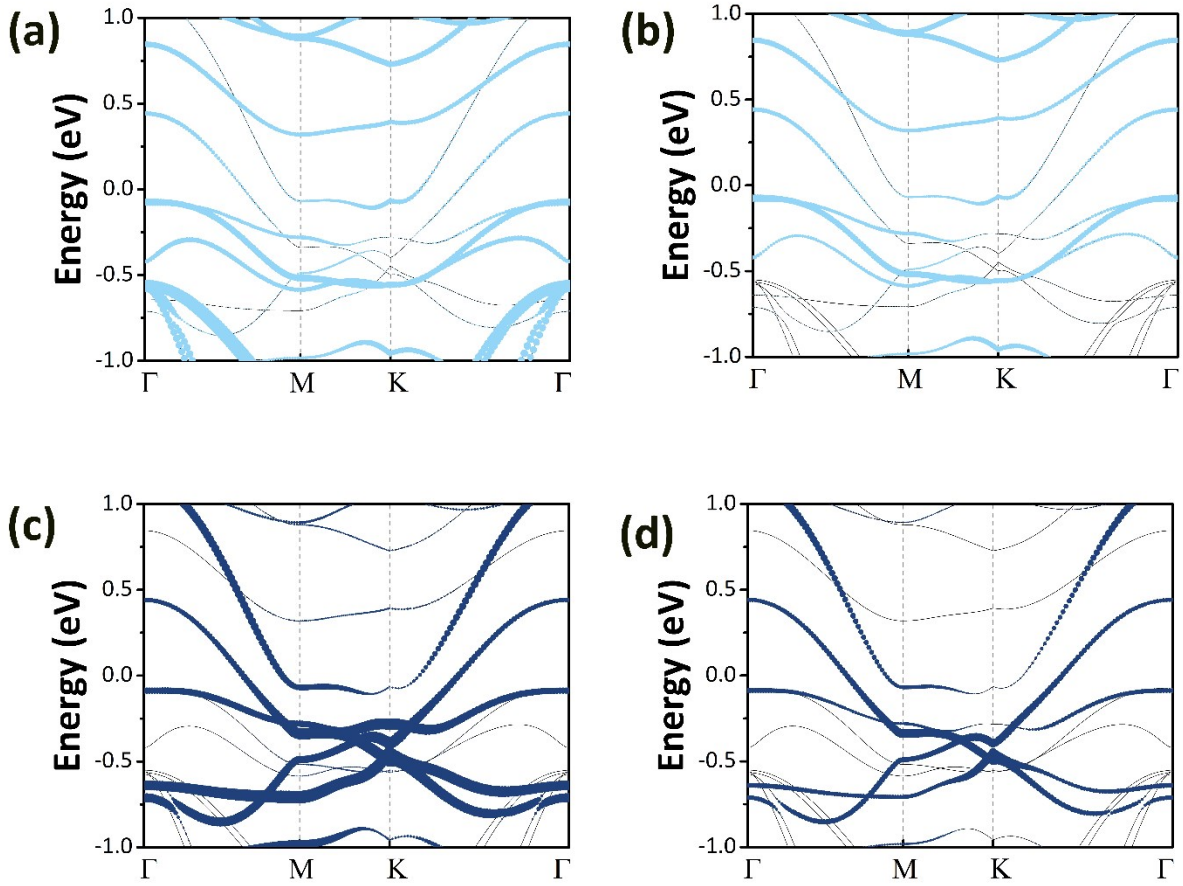

Figure S13. Contributions to PBANDs for AFM  $\text{MoSi}_2\text{N}_2\text{C}_2$  : (a) total electrons of C atoms, (b)  $p_z$ -orbital electrons of C atoms, (c) total electrons of Mo atoms, and (d)  $d_{z^2}$ -orbital electrons of Mo atoms.



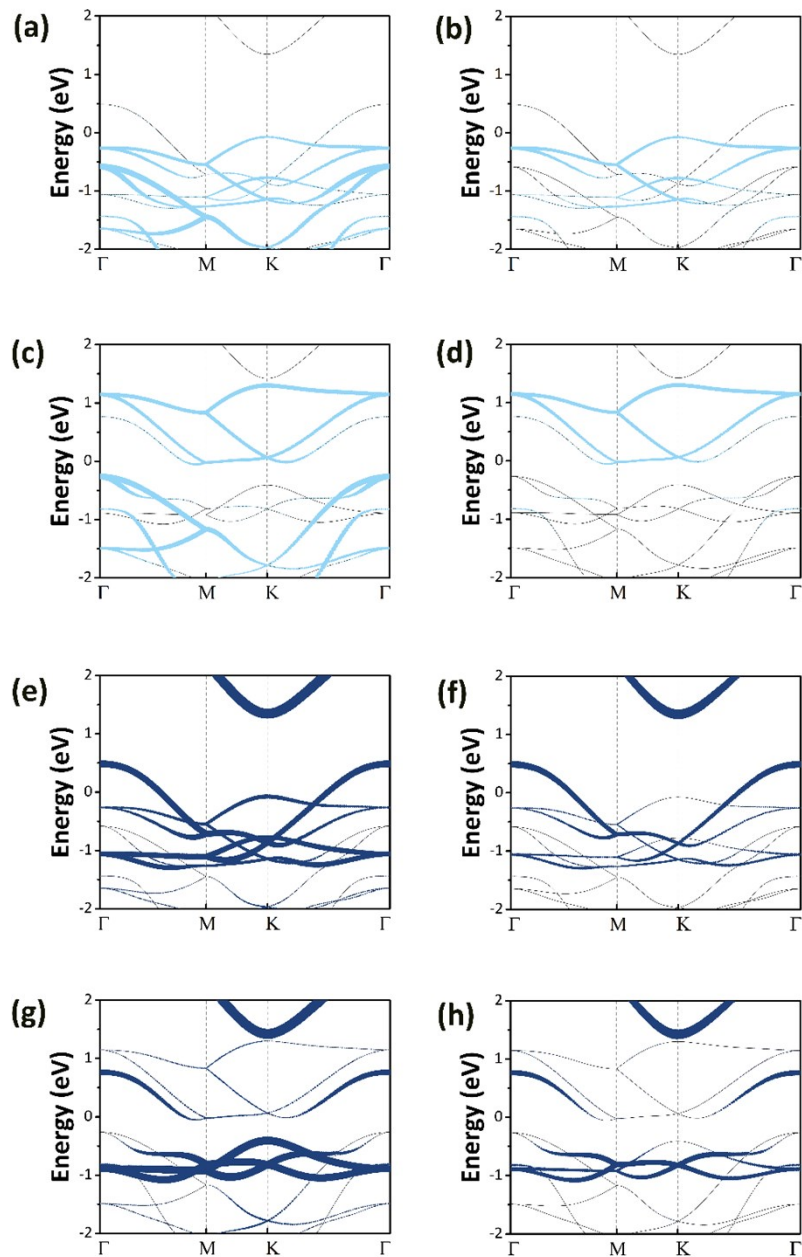

Figure S14. Contributions to PBANDs for FM  $\text{MoSi}_2\text{N}_3\text{C}$  : (a) total spin-up electrons of C atoms, (b) pz-orbital spin-up electrons of C atoms, (c) total spin-down electrons of C atoms, (d) pz-orbital spin-down electrons of C atoms, (e) total spin-up electrons of Mo atoms, (f)  $d_{z^2}$ -orbital spin-up electrons of Mo atoms, (g) total spin-down electrons of Mo atoms, and (h)  $d_{z^2}$ -orbital spin-down electrons of Mo atoms.



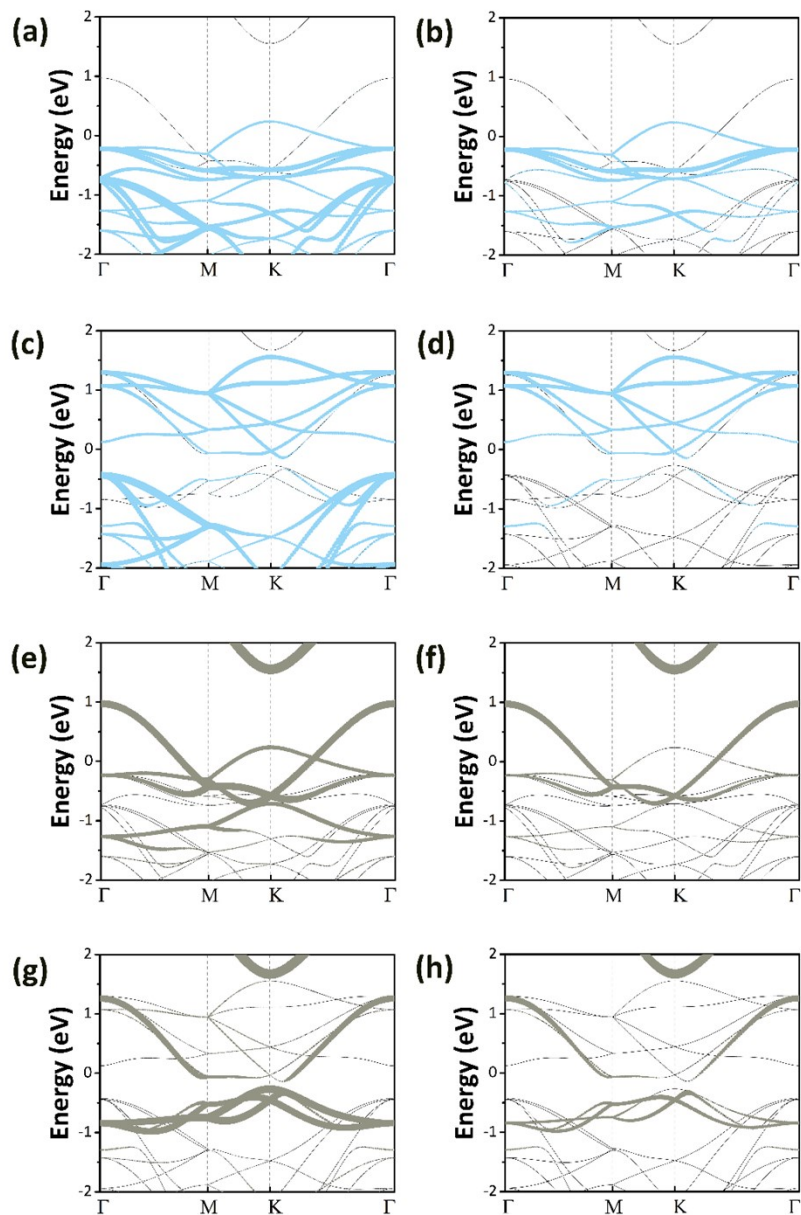

Figure S15. Contributions to PBANDs for FM  $\text{WSi}_2\text{N}_2\text{C}_2$  : (a) total spin-up electrons of C atoms, (b) p $_z$ -orbital orbital spin-up electrons of C atoms, (c) total spin-down electrons of C atoms, (d) p $_z$ -orbital spin-down electrons of C atoms (e) total spin-up electrons of W atoms, (f) d $z^2$ -orbital spin-up electrons of W atoms, (g) total spin-down electrons of W atoms, and (h) d $z^2$ -orbital spin-down electrons of W atoms.

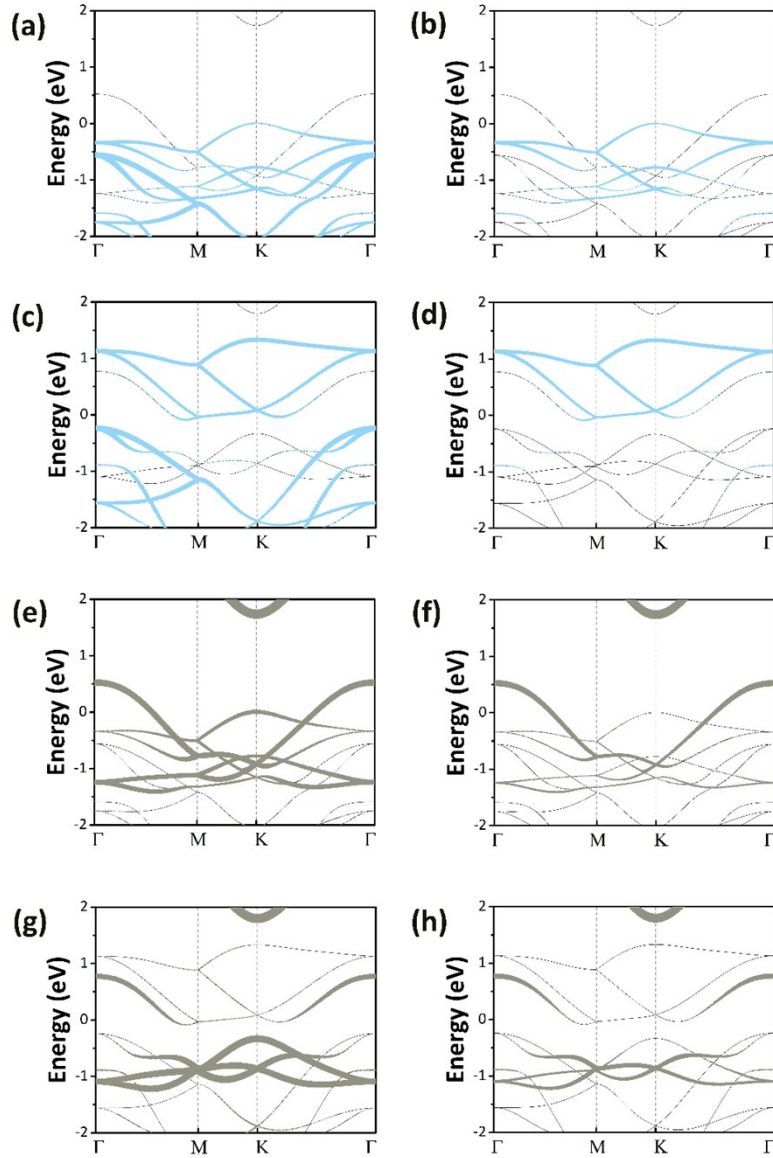

Figure S16. Contributions to PBANDs for FM  $\text{WSi}_2\text{N}_3\text{C}$  : (a) total spin-up electrons of C atoms, (b) p<sub>z</sub>-orbital spin-up electrons of C atoms, (c) total spin-down electrons of C atoms, (d) p<sub>z</sub>-orbital spin-down electrons of C atoms, (e) total spin-up electrons of W atoms, (f) d<sub>z<sup>2</sup></sub>-orbital spin-up electrons of W atoms, (g) total spin-down electrons of W atoms, and (h) d<sub>z<sup>2</sup></sub>-orbital spin-down electrons of W atoms.

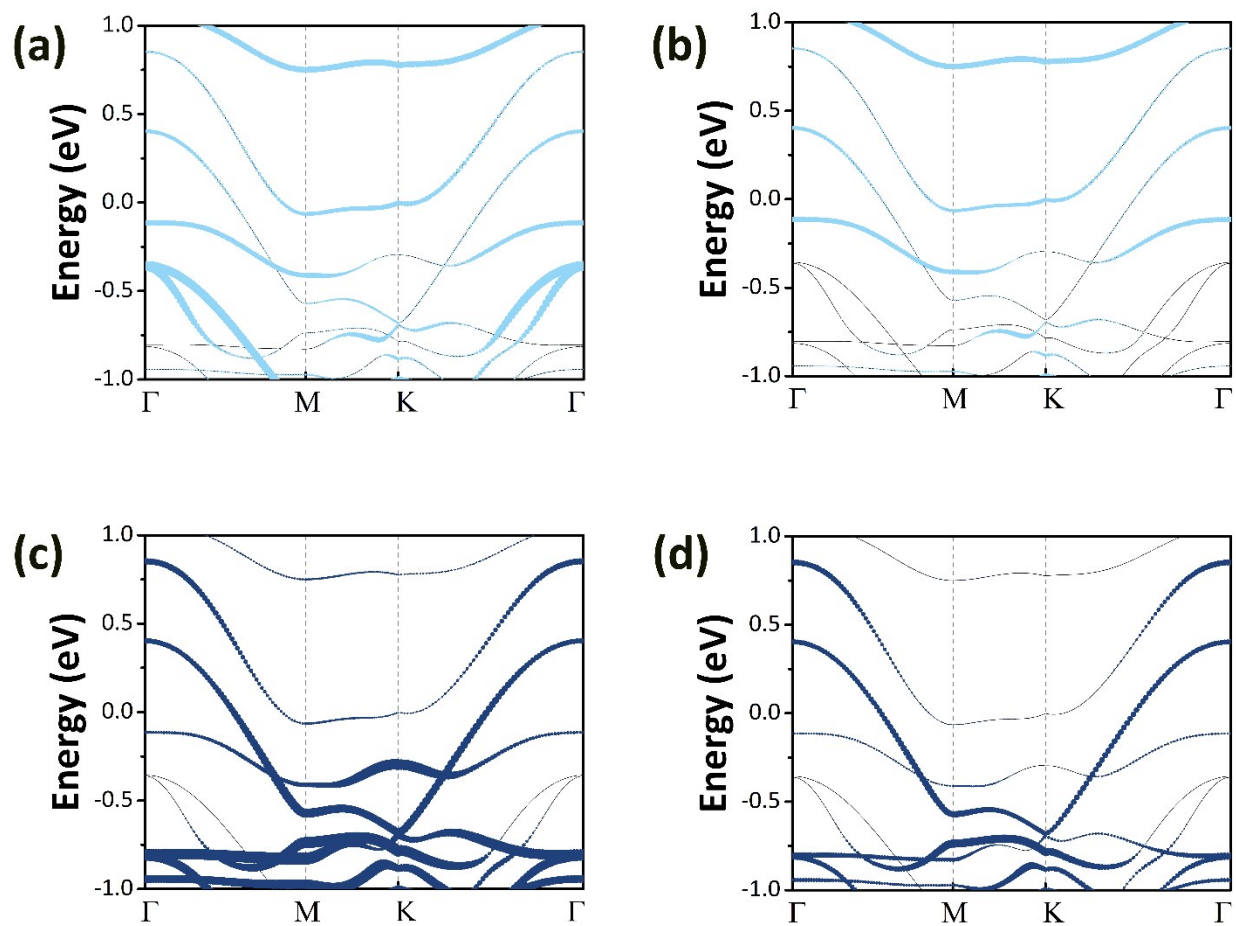

Figure S17. Contributions to PBANDs for AFM  $\text{MoSi}_2\text{N}_3\text{C}$  : (a) total electrons of C atoms, (b) p<sub>z</sub>-orbital electrons of C atoms, (c) total electrons of Mo atoms, and (d) d<sub>z<sup>2</sup></sub>-orbital electrons of Mo atoms.

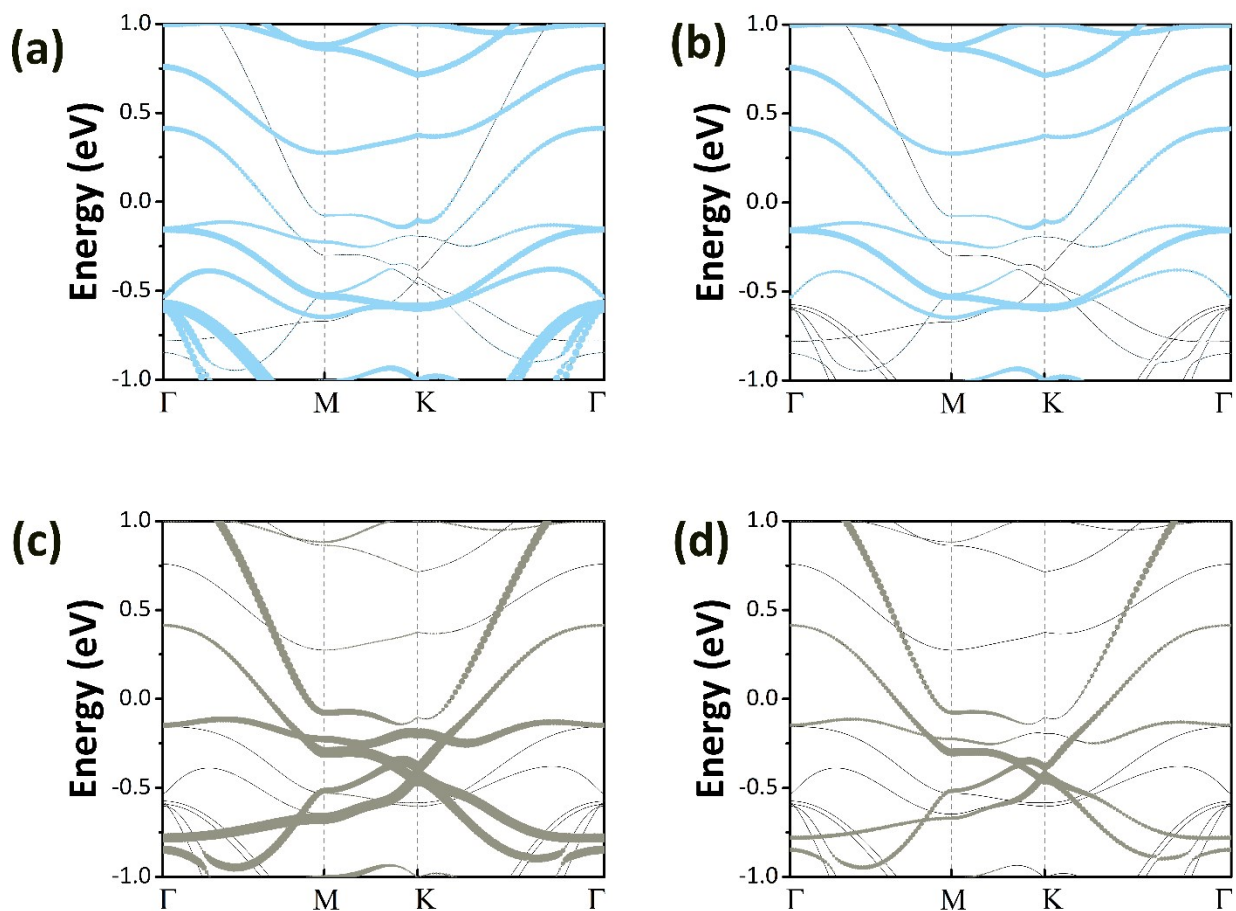

Figure S18. Contributions to PBANDs for AFM  $\text{WSi}_2\text{N}_2\text{C}_2$ : (a) total electrons of C atoms, (b) pz-orbital electrons of C atoms, (c) total electrons of W atoms, and (d)  $d_{z^2}$ -orbital electrons of W atoms.

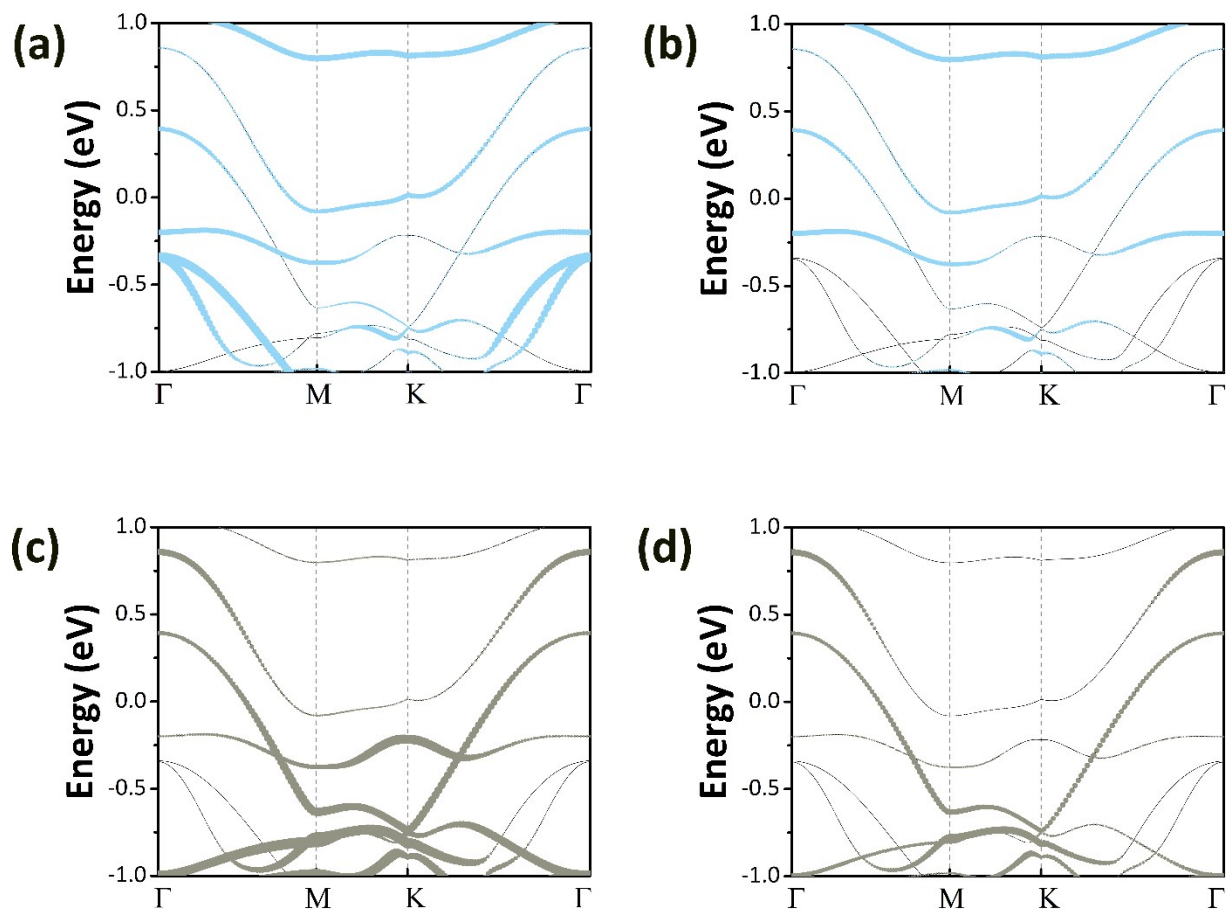

Figure S19. Contributions to PBANDs for AFM  $\text{WSi}_2\text{N}_3\text{C}$  : (a) total electrons of C atoms, (b) pz-orbital electrons of C atoms, (c) total electrons of W atoms, and (d)  $dz^2$ -orbital electrons of W atoms.



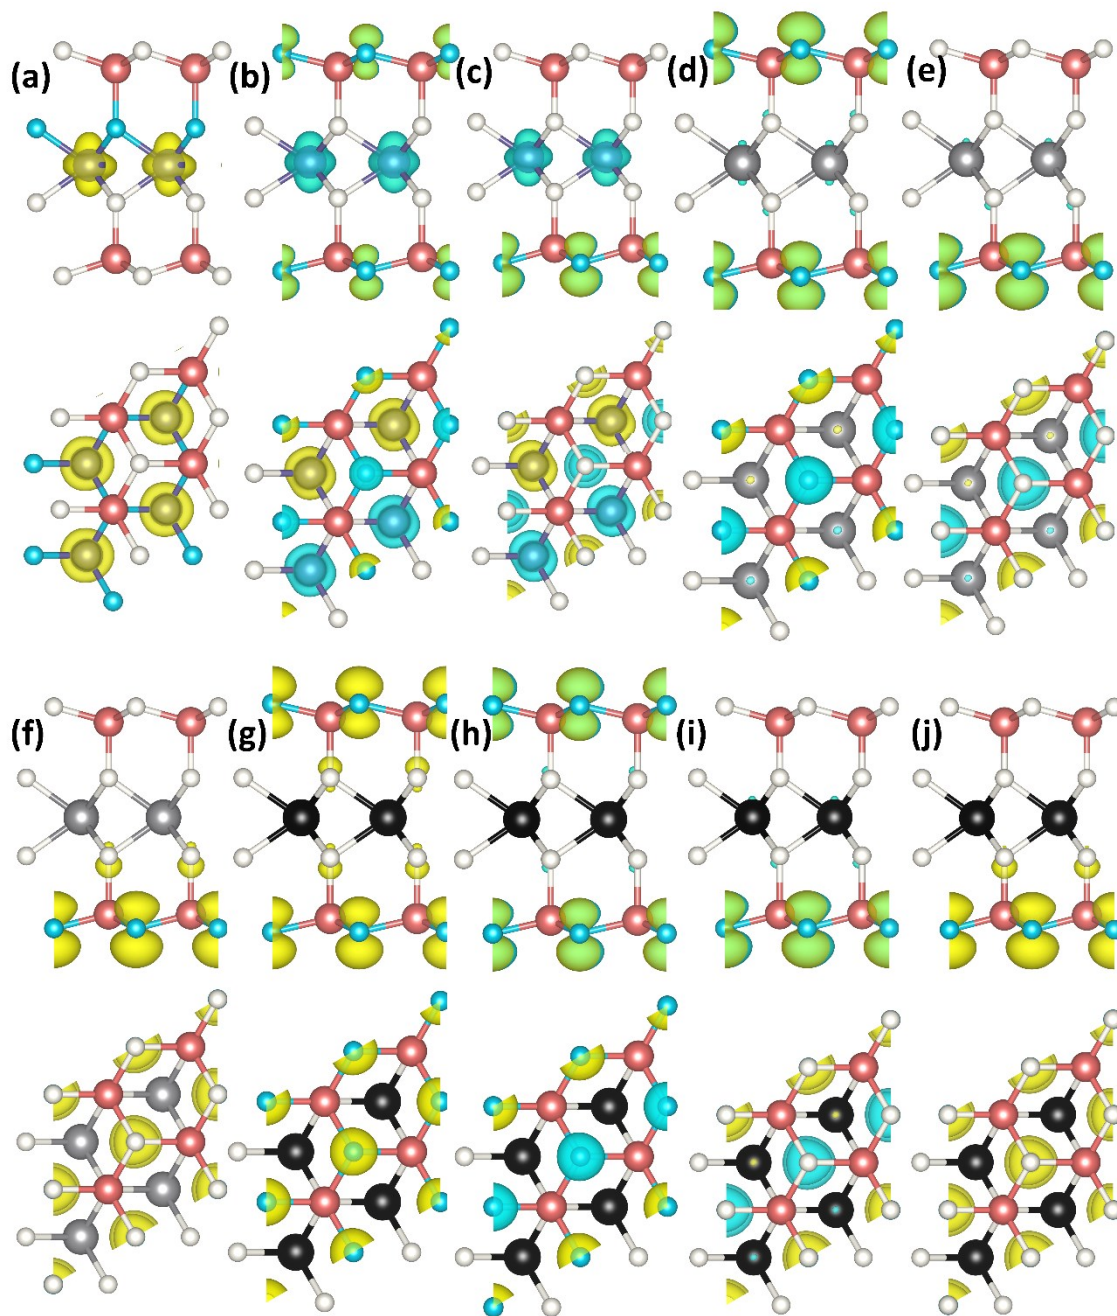

Figure S20. Calculated spin-density for: (a) FM  $\text{CrSi}_2\text{CN}_3$ , (b) AFM  $\text{CrSi}_2\text{N}_2\text{C}_2$ , (c) AFM  $\text{CrSi}_2\text{N}_3\text{C}$ , (d) AFM  $\text{MoSi}_2\text{N}_2\text{C}_2$ , (e) AFM  $\text{MoSi}_2\text{N}_3\text{C}$ , (f) FM  $\text{MoSi}_2\text{N}_3\text{C}$ , (g) FM  $\text{WSi}_2\text{N}_2\text{C}_2$ , (h) AFM  $\text{WSi}_2\text{N}_2\text{C}_2$ , (i) AFM  $\text{WSi}_2\text{N}_3\text{C}$ , and (j) FM  $\text{WSi}_2\text{N}_3\text{C}$ . Yellow and azure indicate spin-up state and spin-down states, respectively.



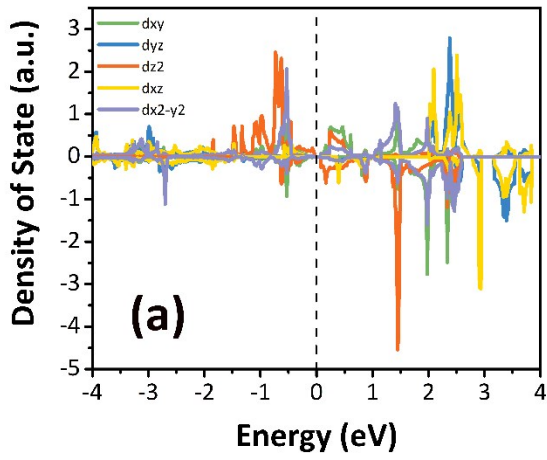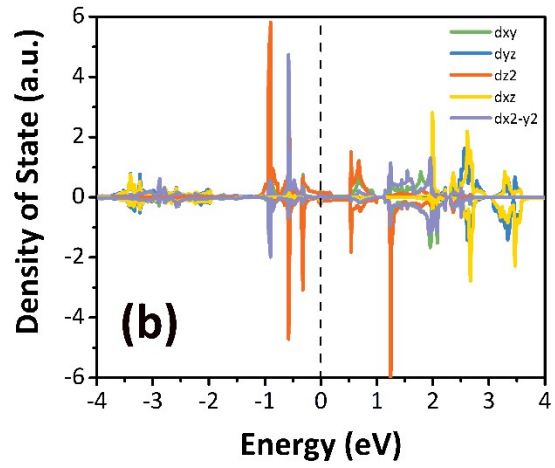

Figure S21. PDOSs of Cr-d electrons in (a)  $\text{CrSi}_2\text{N}_2\text{C}_2$  and (b)  $\text{CrSi}_2\text{N}_3\text{C}$ .

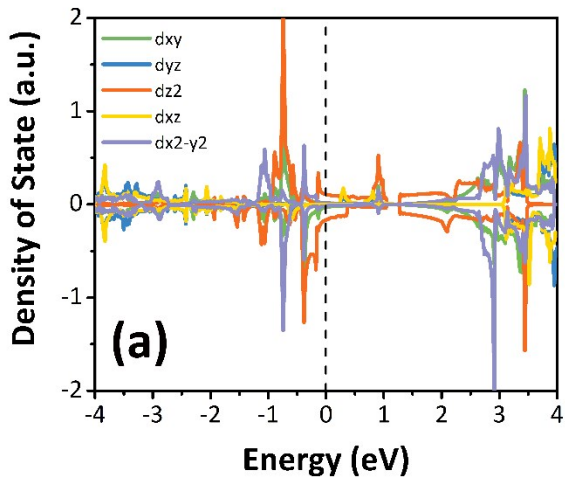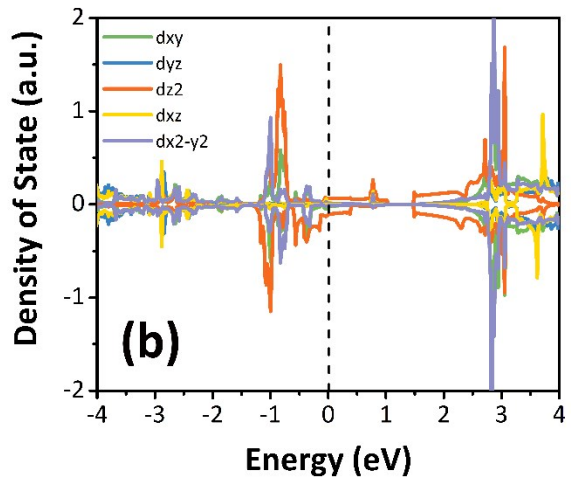

Figure S22. PDOS of Mo-d electrons in (a)  $\text{MoSi}_2\text{N}_2\text{C}_2$  and (b)  $\text{MoSi}_2\text{N}_3\text{C}$ .
